# Supplementary material
Source: PubMed Central journal article supplement (PMC1750877)

WT

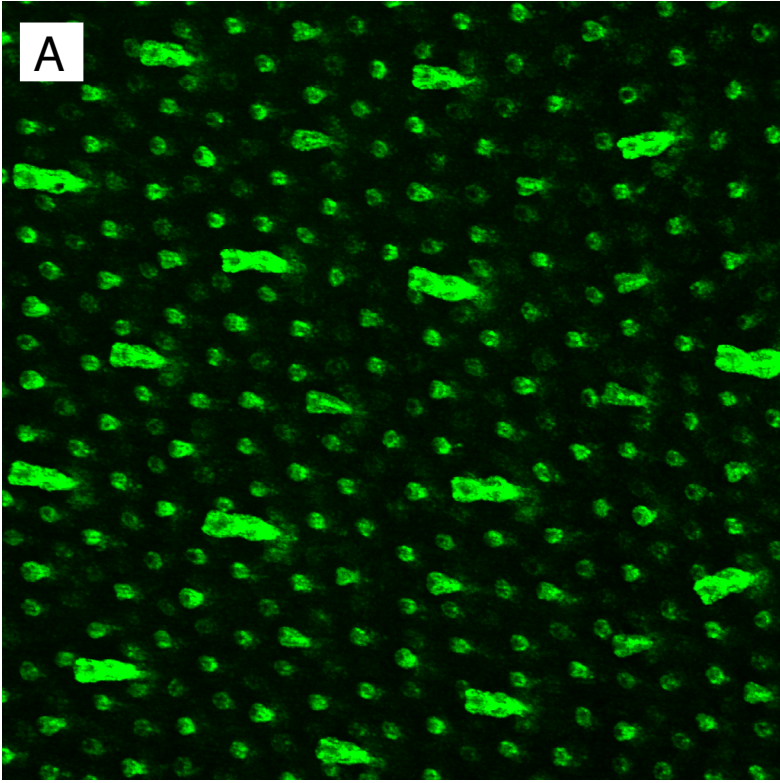

Fz6 -/-

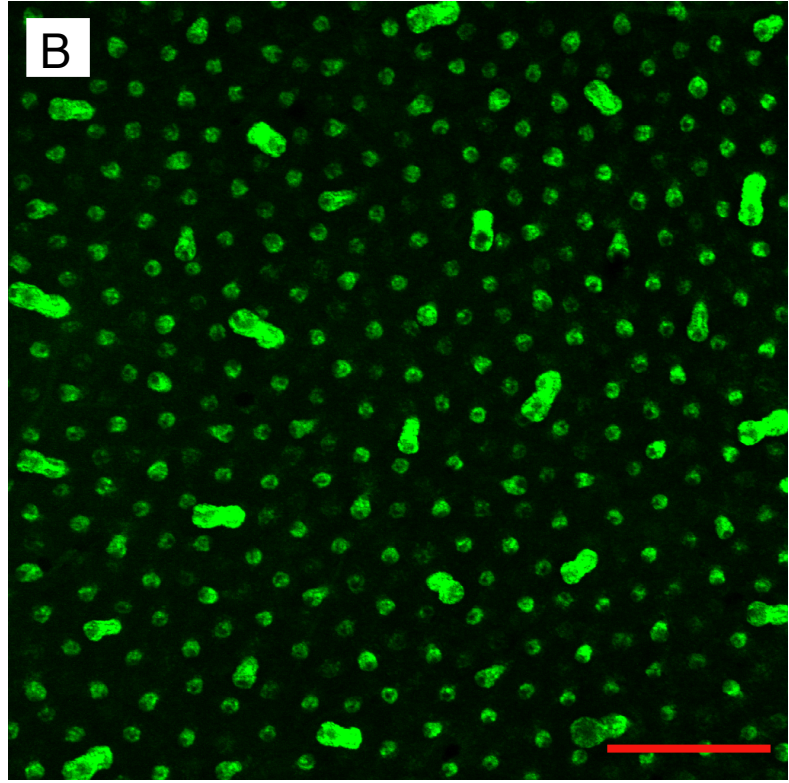

C

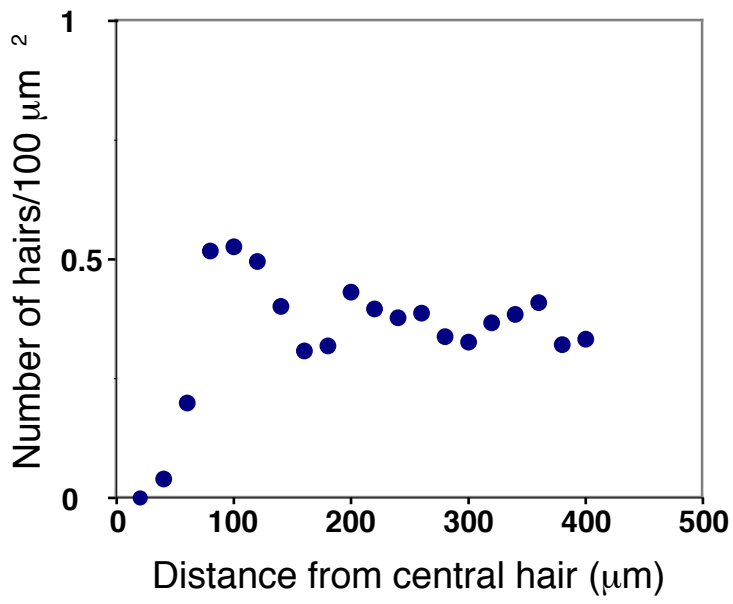

D

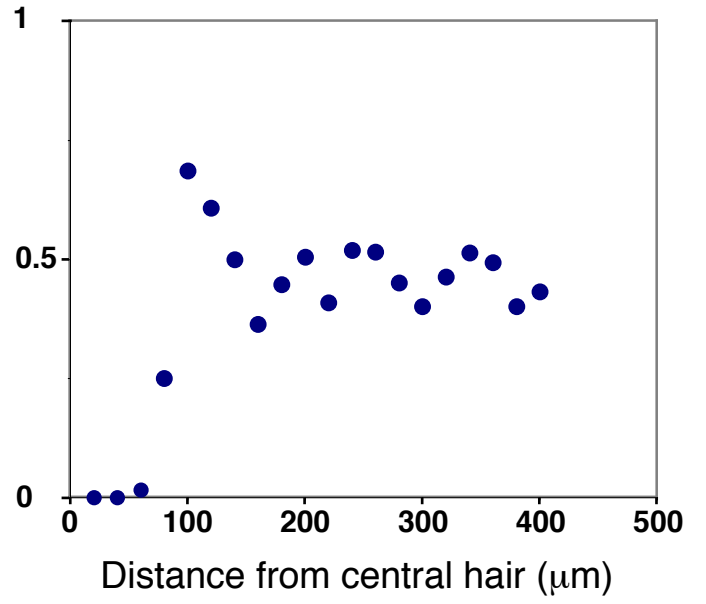

Supplement: pnas_0609712104_1.pdf [file pnas_0609712104_1.pdf]
